# Supplementary material
Source: PubMed Central journal article supplement (PMC8344948)
Supplement: dyab110_supplementary_data.pdf [file dyab110_supplementary_data.pdf]

## Supplementary Box S1. Inferring the probability of infection from serological results

We used multiple imputation (MI) to infer the probability of infection among participants: those with at least one positive ELISA-S, ELISA-NP and SN and no negative test results were assumed to be "truly infected" (n=356), those with all three negative results or ELISA-S <0.7 were assumed to be "truly non infected" (n=13 314) and the rest of participants (n=958) was re-classified according to the MI model using the numerical values from the three serological tests (log-transformed), region, age and gender (Supplementary Box S1 figure 1). Among the "truly infected" participants, 82% (292/356) had three positive tests, 15% (54/356) had two positive tests and 3% (10/356) had one positive test.

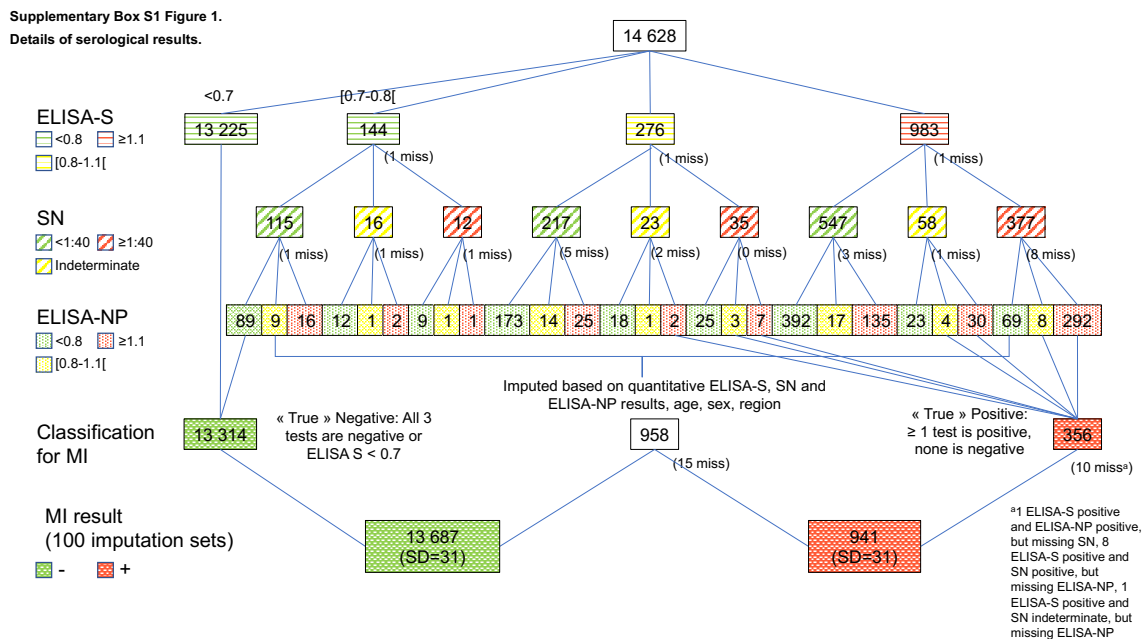

Since the specificity was >95% for each serological test independently (supplementary Box S1 table 1), the likelihood of two or three false positive tests can be considered negligible and that of one false positive test - no negative test was low and concerned very few participants. Therefore, we assumed that the specificity of the MI model for infection status was 100%.

However, an ELISA-S < 0.7 was sufficient to classify a participant as "non-infected" which could be biased by the imperfect sensitivity of this method. We estimated the probability of an ELISA-S  $\geq 0.7$  in participants with positive RT-PCR result in our sample. We found that 77 participants had a positive SARS-CoV-2 RT-PCR less than 3 months before the DBS collection, including 68 (88% (95%CI: 79%, 95%)) with an ELISA-S  $\geq 0.7$ . This value was in line with the test sensitivities reported in samples collected in RT-PCR positive patients (Supplementary Box S1 Table 1). We therefore applied a correction to adjust for imperfect ELISA-S test sensitivity (88% at the 0.7 threshold) to our MI estimates to derive cumulative incidence of SARS-CoV-2 infection.

Supplementary Box S1 Table 1. Accuracy of serological methods

|          | Sensitivity                     | Specificity                     | Reference |
|----------|---------------------------------|---------------------------------|-----------|
| ELISA-S  | threshold for test positive=0.8 | threshold for test positive=1.1 |           |
|          | 90.4% (84.4%; 94.7%)            | 97.5% (95.8%; 98.6%)            | [1]       |
|          | 83.0% (75.6%; 90.4%)            | 99.7% (99.1%; 100%)             | [2]       |
|          | 88.9% (80.1%; 94.3%)            | 100% (91.1%; 100%)              | [3]       |
| ELISA-NP | threshold for test positive=0.8 | threshold for test positive=1.1 |           |
|          | 90.8% (82.7%; 96.0%)            | 97.9% (93.9%; 99.6%)            | [4]       |
|          | 90.0% (81.4%; 95.0%)            | 100% (91.1%; 100%)              | [3]       |
| SN       | NA                              | threshold for test positive=40  |           |
|          |                                 | 100% (99.2%; 100%)              | [5]       |

#### References

1. Patel EU, Bloch EM, Clarke W, Hsieh YH, Boon D, Eby Y, et al. Comparative performance of five commercially available serologic assays to detect antibodies to SARS-CoV-2 and identify individuals with high neutralizing titers. *J Clin Microbiol.* 2021; **59**(2):e02257-20
2. Rikhtegaran Tehrani Z, Saadat S, Saleh E, Ouyang X, Constantine N, DeVico AL, et al. Performance of nucleocapsid and spike-based SARS-CoV-2 serologic assays. *Plos One.* 2020;15(11):e0237828.
3. Cramer A, Goodman N, Cross T, Gant V, Dziadzio M. Analytical evaluation and critical appraisal of early commercial SARS-CoV-2 immunoassays for routine use in a diagnostic laboratory. *Br J Biomed Sci.* 2021; Feb 10:1-6.
4. Favresse J, Cadrobbi J, Eucher C, Elsen M, Laffineur K, Dogne JM, et al. Clinical performance of three fully automated anti-SARS-CoV-2 immunoassays targeting the nucleocapsid or spike proteins. *J Med Virol.* 2021; 93(4):2262-2269.
5. Gallian P, Pastorino B, Morel P, Chiaroni J, Ninove L, de Lamballerie X. Lower prevalence of antibodies neutralizing SARS-CoV-2 in group O French blood donors. *Antiviral Res.* 2020 Jul 14:104880.

## Supplementary Box S2. Weighting and calibration procedures

### *Weighting.*

We used inverse probability weighting to correct for selection bias (when only a subgroup of the whole cohort was invited to participate by internet) and inverse probability weighting to correct for participation bias (when only a subgroup of those invited did participate to the survey). Sampling weights were estimated from each source cohort using inverse predicted probabilities obtained from logistic regression models, with selection or participation as response variables and socio-demographic characteristics as covariates. Age group, gender, region, socio-professional category, smoking status were used in all logistic models, while area deprivation index, household size, housing type, rural/urban life, education level, BMI, perceived health, alcohol consumption, chronic diseases, disability, life satisfaction, confidence in the financial situation could be used in some specific cohort models. No correction was applied for the participation into the serological study as 96.3% of those randomly invited returned a DBS.

### *Calibration.*

An initial cohort-specific calibration was performed by generalized raking in relation to the marginal totals of the age-class, gender and socio-professional-category distributions in the cohort-specific target population. We used 2016 regional population census data for calibration (available at <https://www.insee.fr/fr/statistiques/4171523>).

Target population differed between cohorts and an age- and gender-specific stratum  $s$  may belong to some cohort-specific target populations and not to others. A reweighting procedure was therefore applied to account for (i) the relative stratum-specific sample size of subjects from each cohort and (ii) the marginal totals of the age-class, gender and socio-professional-category distributions in the overall target population.

Let us define  $w_{s,i,j}$  the cohort-specific post-calibration weight for subject  $j \in \llbracket 1, n_{s,j} \rrbracket$  belonging to strata  $s \in S$  in cohort  $i \in \llbracket 1, c_s \rrbracket$ , with:

- $S$  the set of all age- and gender-specific strata;
- $c_s$  the number of cohorts with subjects belonging to stratum  $s$ ;
- $n_{s,i}$  the sample size for stratum  $s$  in cohort  $i$ .

If we note  $N_s$  the population size for stratum  $s$ , these weights are appropriate for cohort-specific estimations using the Horvitz–Thompson estimator as the total weight of subjects belonging to this stratum in cohort  $i$  satisfies the relation:

$$\sum_{j=1}^{n_{s,i}} w_{s,i,j} = N_s$$

We defined for each subject a rescaled weight  $w'_{s,i,j}$ , accounting for the relative sample size of stratum  $s$  from each cohort:

$$w'_{s,i,j} = w_{s,i,j} \frac{n_{s,i}}{\sum_{k=1}^{c_s} n_{s,k}}$$

These rescaled weights allow unbiased estimations in the overall population with the Horvitz–Thompson estimator, as the total weight of subjects belonging to stratum  $s$  in cohort  $i$  satisfies the relation:

$$\sum_{i=1}^{c_s} \sum_{j=1}^{n_{s,i}} w'_{s,i,j} = \sum_{i=1}^{c_s} \left( \frac{n_{s,i}}{\sum_{k=1}^{c_s} n_{s,k}} \sum_{j=1}^{n_{s,i}} w_{s,i,j} \right) = \frac{\sum_{i=1}^{c_s} n_{s,i}}{\sum_{k=1}^{c_s} n_{s,k}} \sum_{j=1}^{n_{s,i}} w_{s,i,j} = N_s$$

This weighting procedure was performed for each region independently.

**Supplementary Figure S1.**  
**Flow chart of participants**

## SAPRIS survey

|                                                                                                           | CONSTANCES                       | E3N-E4N                          | NutriNet-Santé                  |
|-----------------------------------------------------------------------------------------------------------|----------------------------------|----------------------------------|---------------------------------|
| Included in the source cohort (period)                                                                    | 204 973<br>(Dec 2012 - Jan 2020) | 113 000<br>(Jan 1990 - Apr 2020) | 170 454<br>(May 2009- Apr 2020) |
| Followed by internet (eligible)                                                                           | 66 881                           | 89 606                           | 151 122                         |
| Invited (Apr 1, 2020 to Apr 30, 2020)                                                                     | 66 848                           | 61 508                           | 151 122                         |
| 1st Questionnaire (Apr 1, 2020 to May 12, 2020) <sup>1</sup>                                              | 47 337                           | 33 765                           | 39 398                          |
| 2nd Questionnaire (Apr 30, 2020 to May 27, 2020)                                                          | 47 366                           | 30 667                           | 36 562                          |
| 1&2nd Questionnaires                                                                                      | 41 415                           | 28 091                           | 32 495                          |
| 1&2nd Questionnaires IDF, GE, NA                                                                          | 17 354                           | 9939                             | 11 554                          |
| <hr/> <p>Random selection</p> <p style="text-align: center;"><b>This study:<br/>SAPRIS-SERO study</b></p> |                                  |                                  |                                 |
| Invited to the serology IDF, GE, NA                                                                       | 8000                             | 2100                             | 5900                            |
| Returned dried blood spot                                                                                 | 7586                             | 2053                             | 5775                            |
| Serology performed                                                                                        | 7343                             | 1920                             | 5567                            |
| Serology performed and interpretable 1&2nd Questionnaires IDF, GE, NA                                     | 7329                             | 1863                             | 5436                            |

See supplementary Box S2 for the weighting and calibration procedures

**Supplementary Figure S2.**

**Comparison of raw and calibrated age distributions by gender with the distribution in the general population (rows).**

**IDF: Ile-de-France, GE: Grand Est, NA: Nouvelle Aquitaine**

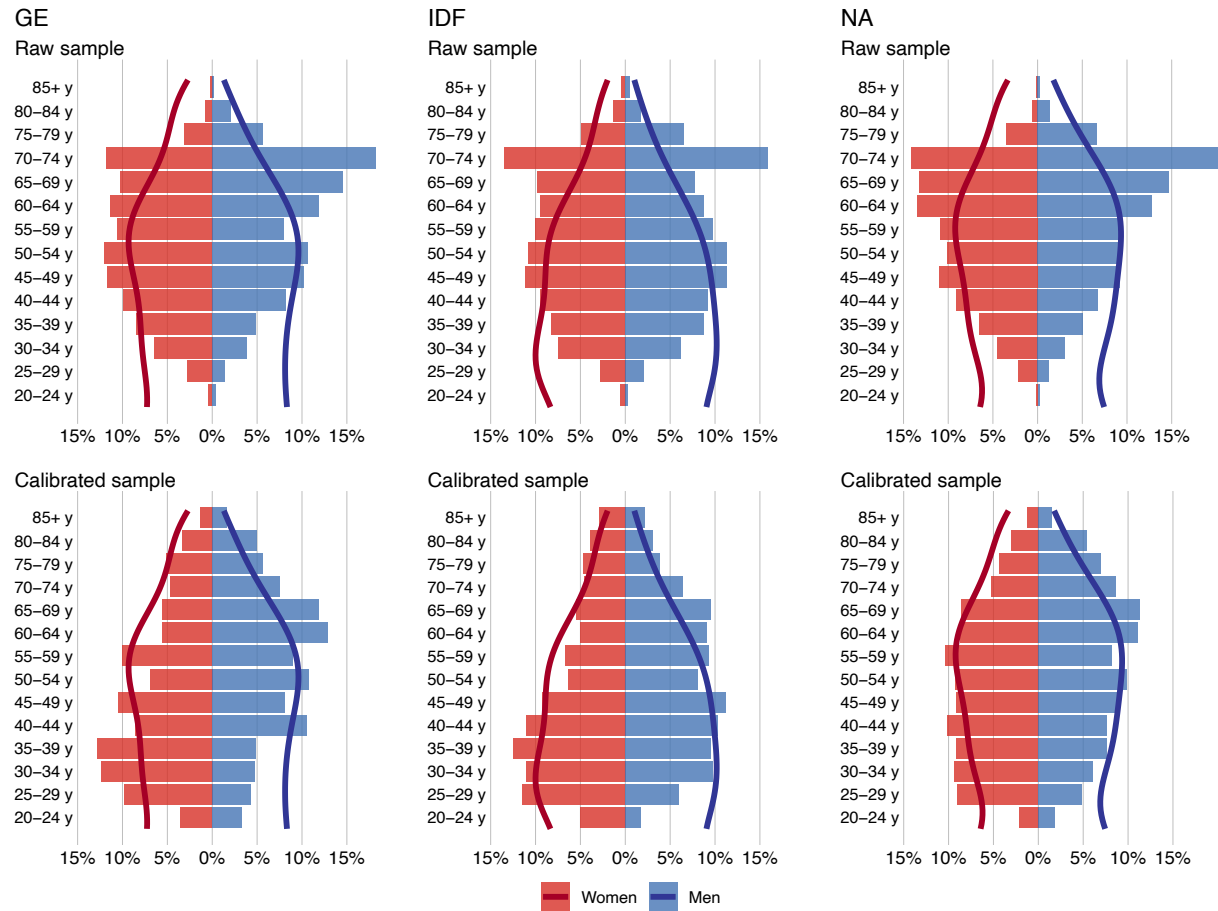

### Supplementary Figure S3.

#### Positive ELISA-NP and SN in ELISA-S positive participants according to reported symptoms

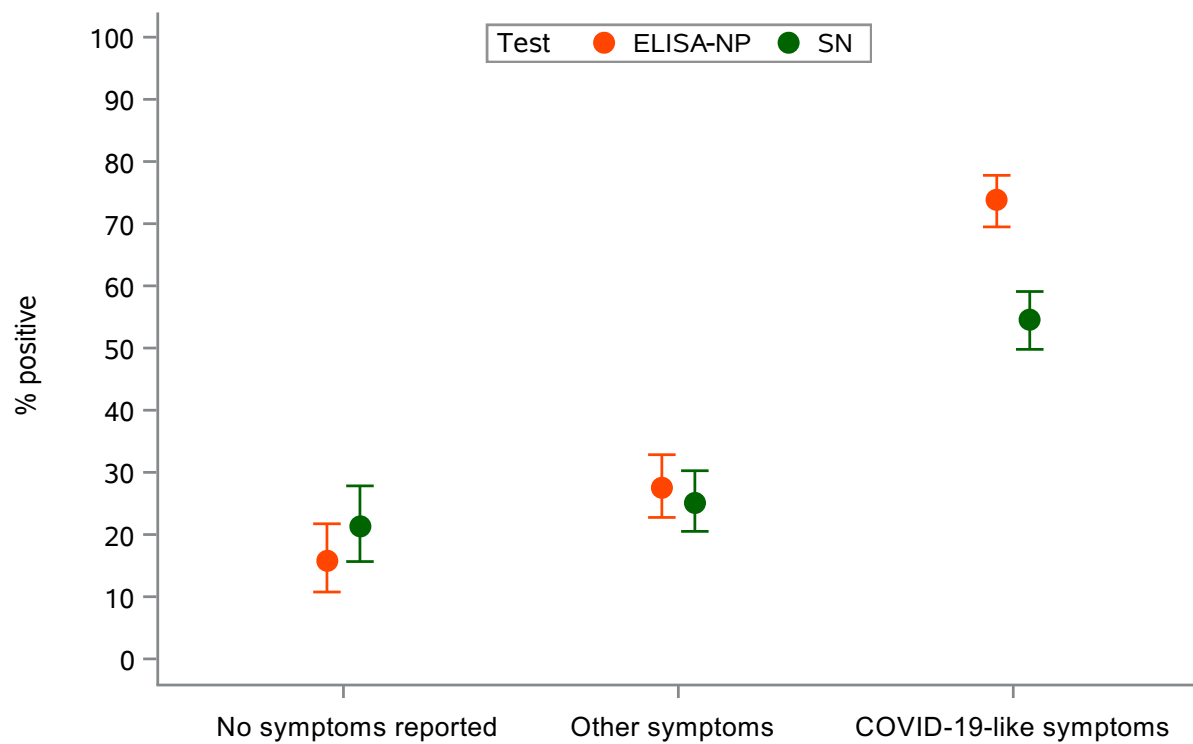

Number of participants with ELISA-S positive test (number with ELISA-NP or SN positive test)

|          |          |          |           |
|----------|----------|----------|-----------|
| ELISA-NP | 185 (29) | 319 (88) | 454 (335) |
| SN       | 188 (40) | 322 (81) | 459 (250) |

**Supplementary Figure S4.**

**Positive serological results by age and region.**

**(weighted estimates; MI positive showed cumulative incidence estimates corrected for imperfect test accuracies)**

**IDF: Ile-de-France, GE: Grand Est, NA: Nouvelle Aquitaine**

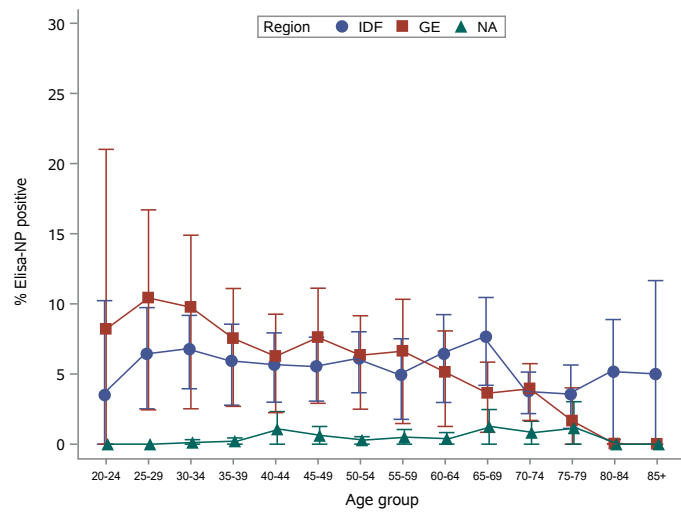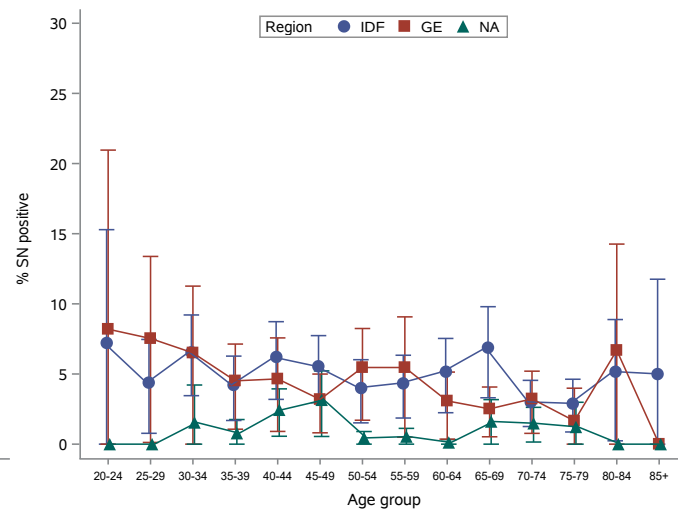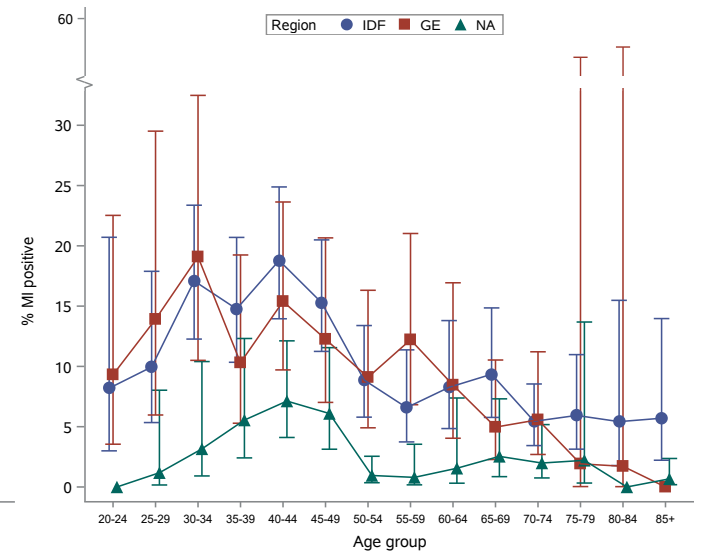

**Supplementary Figure S5.**

**Positive serological results by age and region.**

(unweighted estimates, numbers indicate participants and positive tests; MI positive showed cumulative incidence estimates corrected for imperfect test accuracy)

IDF: Ile-de-France, GE: Grand Est, NA: Nouvelle Aquitaine

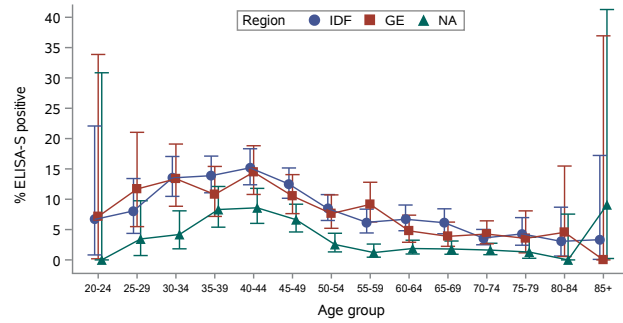

Number participants

|     |    |     |     |     |     |     |     |     |     |     |     |     |    |    |
|-----|----|-----|-----|-----|-----|-----|-----|-----|-----|-----|-----|-----|----|----|
| IDF | 30 | 161 | 444 | 533 | 593 | 712 | 698 | 630 | 582 | 571 | 916 | 350 | 98 | 30 |
| GE  | 14 | 77  | 187 | 241 | 318 | 380 | 393 | 328 | 397 | 412 | 493 | 141 | 44 | 8  |
| NA  | 10 | 87  | 191 | 289 | 396 | 498 | 473 | 497 | 641 | 669 | 805 | 232 | 47 | 11 |

Number ELISA-S positive

|     |   |    |    |    |    |    |    |    |    |    |    |    |   |   |
|-----|---|----|----|----|----|----|----|----|----|----|----|----|---|---|
| IDF | 2 | 13 | 60 | 74 | 90 | 89 | 59 | 39 | 39 | 35 | 33 | 15 | 3 | 1 |
| GE  | 1 | 9  | 25 | 26 | 46 | 40 | 30 | 30 | 19 | 16 | 21 | 5  | 2 | 0 |
| NA  | 0 | 3  | 8  | 24 | 34 | 33 | 12 | 6  | 12 | 12 | 13 | 3  | 0 | 1 |

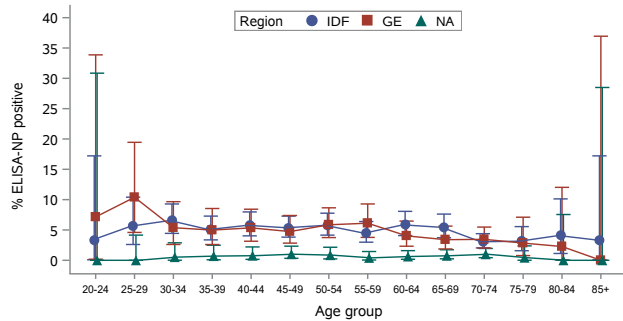

Number participants

|     |    |     |     |     |     |     |     |     |     |     |     |     |    |    |
|-----|----|-----|-----|-----|-----|-----|-----|-----|-----|-----|-----|-----|----|----|
| IDF | 30 | 160 | 442 | 533 | 589 | 709 | 694 | 627 | 582 | 571 | 916 | 350 | 98 | 30 |
| GE  | 14 | 77  | 186 | 241 | 318 | 380 | 393 | 327 | 397 | 412 | 492 | 141 | 44 | 8  |
| NA  | 10 | 87  | 191 | 288 | 395 | 498 | 473 | 497 | 641 | 669 | 805 | 232 | 47 | 11 |

Number ELISA-NP positive

|     |   |   |    |    |    |    |    |    |    |    |    |    |   |   |
|-----|---|---|----|----|----|----|----|----|----|----|----|----|---|---|
| IDF | 1 | 9 | 29 | 27 | 34 | 38 | 40 | 28 | 34 | 31 | 28 | 11 | 4 | 1 |
| GE  | 1 | 8 | 10 | 12 | 17 | 18 | 23 | 20 | 16 | 14 | 17 | 4  | 1 | 0 |
| NA  | 0 | 0 | 1  | 2  | 3  | 5  | 4  | 2  | 4  | 5  | 8  | 1  | 0 | 0 |

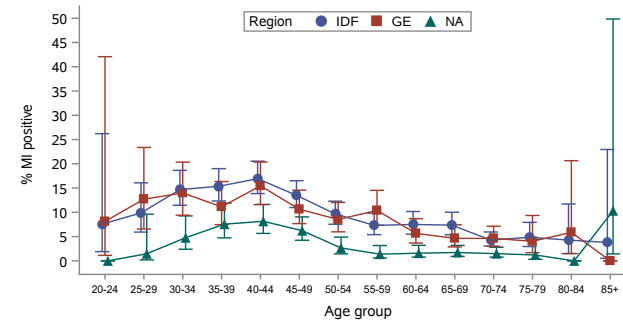

Number participants

|     |    |     |     |     |     |     |     |     |     |     |     |     |    |    |
|-----|----|-----|-----|-----|-----|-----|-----|-----|-----|-----|-----|-----|----|----|
| IDF | 30 | 161 | 444 | 533 | 593 | 712 | 698 | 630 | 582 | 571 | 916 | 350 | 98 | 30 |
| GE  | 14 | 77  | 187 | 241 | 318 | 380 | 393 | 328 | 397 | 412 | 493 | 141 | 44 | 8  |
| NA  | 10 | 87  | 191 | 289 | 396 | 498 | 473 | 497 | 641 | 669 | 805 | 232 | 47 | 11 |

Number MI positive

|     |     |      |      |      |      |      |      |      |      |      |      |      |     |     |
|-----|-----|------|------|------|------|------|------|------|------|------|------|------|-----|-----|
| IDF | 2.3 | 15.9 | 65.2 | 81.9 | 100  | 96.2 | 67.4 | 46.0 | 43.7 | 42.0 | 39.2 | 17.0 | 4.2 | 1.1 |
| GE  | 1.1 | 9.8  | 26.1 | 26.9 | 49.2 | 40.4 | 33.5 | 34.1 | 22.5 | 19.1 | 22.8 | 5.7  | 2.6 | 0.0 |
| NA  | 0.0 | 1.3  | 9.1  | 21.9 | 32.3 | 31.0 | 12.6 | 6.8  | 10.1 | 11.5 | 11.9 | 2.8  | 0.0 | 1.1 |

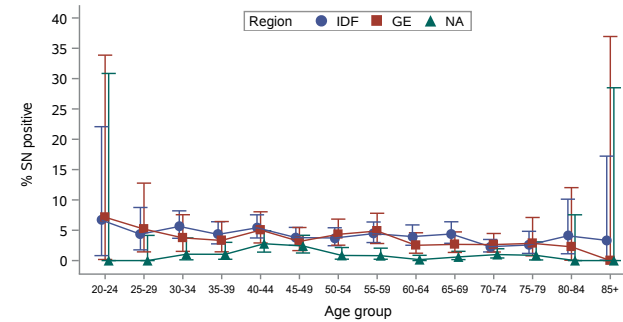

Number participants

|     |    |     |     |     |     |     |     |     |     |     |     |     |    |    |
|-----|----|-----|-----|-----|-----|-----|-----|-----|-----|-----|-----|-----|----|----|
| IDF | 30 | 161 | 444 | 533 | 582 | 712 | 698 | 630 | 581 | 571 | 916 | 350 | 98 | 30 |
| GE  | 14 | 77  | 187 | 241 | 318 | 380 | 393 | 328 | 397 | 412 | 493 | 141 | 44 | 8  |
| NA  | 10 | 87  | 191 | 289 | 396 | 498 | 473 | 497 | 641 | 668 | 805 | 232 | 47 | 11 |

Number SN positive

|     |   |   |    |    |    |    |    |    |    |    |    |   |   |   |
|-----|---|---|----|----|----|----|----|----|----|----|----|---|---|---|
| IDF | 2 | 7 | 25 | 23 | 32 | 27 | 26 | 28 | 23 | 25 | 21 | 9 | 4 | 1 |
| GE  | 1 | 4 | 7  | 8  | 16 | 12 | 17 | 16 | 10 | 11 | 13 | 4 | 1 | 0 |
| NA  | 0 | 0 | 2  | 3  | 11 | 12 | 4  | 4  | 1  | 4  | 8  | 2 | 0 | 0 |



**Supplementary Table S1. Participant characteristics.**

|                                       | Total adults  | Ile-de-France (IDF) | Grand Est (GE) | Nouvelle-Aquitaine (NA) |
|---------------------------------------|---------------|---------------------|----------------|-------------------------|
|                                       | 14 628        | 6348                | 3434           | 4846                    |
| Questionnaire 1                       |               |                     |                |                         |
| First                                 | Apr 1, 2020   | Apr 1, 2020         | Apr 1, 2020    | Apr 1, 2020             |
| Last                                  | May 12, 2020  | May 12, 2020        | May 12, 2020   | May 12, 2020            |
| Questionnaire 2                       |               |                     |                |                         |
| First                                 | Apr 30, 2020  | Apr 30, 2020        | Apr 30, 2020   | Apr 30, 2020            |
| Last                                  | May 27, 2020  | May 20, 2020        | May 27, 2020   | May 19, 2020            |
| Dried blood spot collection           |               |                     |                |                         |
| First                                 | May 4, 2020   | May 4, 2020         | May 4, 2020    | May 4, 2020             |
| Last                                  | June 23, 2020 | June 14, 2020       | June 23, 2020  | June 21, 2020           |
| Missing                               | 70            | 28                  | 18             | 24                      |
| Source cohort                         |               |                     |                |                         |
| Constances                            | 7329 (50)     | 2689 (42)           | 1629 (47)      | 3014 (62)               |
| E3N-E4N                               | 1863 (13)     | 728 (11)            | 584 (17)       | 551 (11)                |
| NutriNet-Sante                        | 5436 (37)     | 2934 (46)           | 1221 (36)      | 1281 (26)               |
| Age group (years)                     |               |                     |                |                         |
| <40                                   | 2265 (15)     | 1168 (18)           | 520 (15)       | 577 (12)                |
| [40-50[                               | 2897 (20)     | 1305 (21)           | 698 (20)       | 894 (18)                |
| [50-60[                               | 3019 (21)     | 1328 (21)           | 721 (21)       | 970 (20)                |
| [60-70[                               | 3272 (22)     | 1153 (22)           | 809 (24)       | 1310 (27)               |
| >=70                                  | 3175 (22)     | 1394 (22)           | 686 (20)       | 1095 (23)               |
| Gender                                |               |                     |                |                         |
| Male                                  | 5810 (40)     | 2469 (39)           | 1357 (40)      | 1984 (41)               |
| Female                                | 8818 (60)     | 3879 (61)           | 2077 (60)      | 2862 (59)               |
| Living Area                           |               |                     |                |                         |
| Rural                                 | 2176 (15)     | 222 (4)             | 937 (27)       | 1017 (21)               |
| <20,000 inhab.                        | 1863 (13)     | 716 (11)            | 516 (15)       | 931 (13)                |
| 20-000-100,000 inhab.                 | 2797 (19)     | 1644 (26)           | 460 (13)       | 693 (14)                |
| >100,000 inhab.                       | 7769 (53)     | 3763 (59)           | 1518 (44)      | 2488 (52)               |
| Missing                               | 23            | 3                   | 3              | 17                      |
| Household size and composition        |               |                     |                |                         |
| Nb adults (inc. participants)         |               |                     |                |                         |
| 1                                     | 2851 (19)     | 1562 (25)           | 571 (17)       | 718 (15)                |
| 2                                     | 6533 (45)     | 2594 (41)           | 1559 (45)      | 2380 (49)               |
| 3+                                    | 5244 (36)     | 2192 (35)           | 1304 (38)      | 1748 (36)               |
| Nb children (<18yrs)                  |               |                     |                |                         |
| 0                                     | 10 848 (74)   | 4740 (75)           | 2511 (73)      | 3597 (74)               |
| 1+                                    | 3780 (26)     | 1608 (25)           | 923 (27)       | 1249 (26)               |
| Nb rooms                              |               |                     |                |                         |
| 1-2                                   | 1696 (12)     | 1334 (21)           | 165 (5)        | 197 (4)                 |
| 3-4                                   | 5715 (39)     | 2998 (48)           | 1108 (33)      | 1609 (34)               |
| 5-6                                   | 5366 (37)     | 1546 (25)           | 1562 (46)      | 2258 (47)               |
| 7+                                    | 1700 (12)     | 416 (7)             | 566 (17)       | 718 (15)                |
| Missing                               | 151           | 54                  | 33             | 64                      |
| Total household monthly income        |               |                     |                |                         |
| <1000€                                | 201 (1)       | 86 (1)              | 41 (1)         | 74 (2)                  |
| 1000-1499                             | 447 (3)       | 154 (3)             | 104 (3)        | 189 (4)                 |
| 1500-1999                             | 1000 (7)      | 363 (6)             | 251 (8)        | 386 (8)                 |
| 2000-2999                             | 2500 (18)     | 929 (16)            | 628 (20)       | 943 (20)                |
| 3000-3999                             | 3426 (25)     | 1111 (19)           | 883 (28)       | 1432 (31)               |
| >4000                                 | 6045 (44)     | 3184 (55)           | 1255 (40)      | 1606 (35)               |
| Missing                               | 1009          | 521                 | 272            | 216                     |
| Educational level                     |               |                     |                |                         |
| <High-school degree                   | 1629 (12)     | 382 (7)             | 472 (16)       | 775 (17)                |
| High-school degree or undergraduate   | 6032 (45)     | 2026 (35)           | 1592 (52)      | 2414 (54)               |
| Graduate degree or doctorate          | 5646 (42)     | 3405 (59)           | 971 (32)       | 1270 (28)               |
| Missing                               | 1321          | 535                 | 399            | 387                     |
| Professional activity before lockdown |               |                     |                |                         |
| Student                               | 81 (1)        | 42 (1)              | 19 (1)         | 20 (0)                  |
| Working                               | 8309 (57)     | 3912 (62)           | 1961 (57)      | 2436 (50)               |
| Looking for a job                     | 402 (3)       | 186 (3)             | 86 (3)         | 130 (3)                 |
| Retired                               | 5381 (37)     | 2024 (32)           | 1256 (37)      | 2101 (43)               |
| Not working due to health conditions  | 125 (1)       | 46 (1)              | 27 (1)         | 52 (1)                  |

|                                                 |           |           |           |           |
|-------------------------------------------------|-----------|-----------|-----------|-----------|
| No professional activity (housewife or husband) | 306 (2)   | 129 (2)   | 78 (2)    | 102 (2)   |
| Missing                                         | 24        | 12        | 7         | 5         |
| Essential job position                          |           |           |           |           |
| Healthcare worker                               | 568 (4)   | 196 (3)   | 165 (5)   | 207 (4)   |
| Other essential job                             | 1425 (10) | 476 (8)   | 415 (12)  | 534 (11)  |
| Professional activity during lockdown           |           |           |           |           |
| Not working                                     | 6295 (44) | 2424 (39) | 1466 (44) | 2405 (51) |
| Stopped working                                 | 1457 (10) | 607 (10)  | 379 (11)  | 471 (10)  |
| Working from home, remote working               | 4444 (31) | 2507 (40) | 891 (26)  | 1046 (22) |
| Partially working from home                     | 759 (5)   | 270 (4)   | 220 (7)   | 269 (6)   |
| Working outside home                            | 1134 (8)  | 341 (5)   | 348 (10)  | 445 (9)   |
| Other                                           | 242 (2)   | 70 (1)    | 66 (2)    | 106 (2)   |
| Missing                                         | 297       | 129       | 64        | 104       |
| Smoking status before lockdown                  |           |           |           |           |
| Active smoker                                   | 1750 (12) | 795 (13)  | 372 (11)  | 583 (12)  |
| Ex-smoker                                       | 5973 (42) | 2590 (41) | 1360 (40) | 2023 (43) |
| Non smoker                                      | 6670 (46) | 2858 (46) | 1658 (49) | 2154 (45) |
| Missing                                         | 235       | 105       | 44        | 86        |
| Alcohol use before lockdown (in g/dy)           |           |           |           |           |
| <5                                              | 5803 (42) | 2548 (42) | 1413 (43) | 1842 (40) |
| [5,10[                                          | 2641 (19) | 1111 (18) | 649 (20)  | 881 (19)  |
| [10,20[                                         | 2963 (21) | 1253 (21) | 722 (22)  | 988 (22)  |
| [20,30[                                         | 1359 (10) | 580 (10)  | 270 (8)   | 509 (11)  |
| ≥30                                             | 1128 (8)  | 527 (9)   | 244 (7)   | 357 (8)   |
| Missing                                         | 734       | 329       | 136       | 269       |
| Body Mass Index (kg/m <sup>2</sup> )            |           |           |           |           |
| <18.5                                           | 499 (3)   | 262 (4)   | 96 (3)    | 141 (3)   |
| [18.5; 25[                                      | 8521 (59) | 3953 (63) | 1845 (54) | 2723 (57) |
| [25; 30[ (overweight)                           | 3995 (28) | 1527 (24) | 1028 (30) | 1440 (30) |
| >=30 (obese)                                    | 1409 (10) | 506 (8)   | 420 (12)  | 483 (10)  |
| Missing                                         | 204       | 100       | 45        | 59        |
| Chronic diseases                                |           |           |           |           |
| Yes                                             | 4756 (33) | 1977 (31) | 1153 (34) | 1626 (34) |
| No                                              | 9767 (67) | 4321 (68) | 2258 (66) | 3188 (66) |
| Don't know                                      | 80 (1)    | 40 (1)    | 20 (1)    | 20 (0)    |
| Missing                                         | 25        |           |           |           |
| Chronic diseases                                |           |           |           |           |
| Asthma, COPD, other respir. diseases            | 1534 (11) | 723 (11)  | 377 (11)  | 434 (9)   |
| Diabetes                                        | 481 (3)   | 192 (3)   | 141 (4)   | 148 (3)   |
| Hypertension                                    | 1553 (11) | 626 (10)  | 419 (12)  | 508 (11)  |
| Other cardiovascular diseases                   | 451 (3)   | 174 (3)   | 109 (3)   | 168 (3)   |
| Cancer                                          | 830 (6)   | 405 (6)   | 193 (6)   | 232 (5)   |
| Anxiety, depression                             | 404 (3)   | 164 (3)   | 102 (3)   | 138 (3)   |
| Other                                           | 1826 (13) | 827 (13)  | 459 (13)  | 540 (11)  |
| Missing                                         | 25        | 10        | 3         | 12        |

**Supplementary Table S2. Multivariable analysis of factors associated with a positive ELISA-NP.**

|                                                                | Odds-Ratio <sup>a</sup> | 95%CI      | P-value |
|----------------------------------------------------------------|-------------------------|------------|---------|
| <b>Regions</b>                                                 |                         |            |         |
| Ile-de-France                                                  | 6.54                    | 4.58, 9.32 | <0.0001 |
| Grand Est                                                      | 6.20                    | 4.28, 8.99 | <0.0001 |
| Nouvelle-Aquitaine                                             | Reference               |            |         |
| <b>Age group (years)</b>                                       |                         |            |         |
| <40                                                            | 1.06                    | 0.80, 1.42 | 0.6818  |
| [40-50[                                                        | 0.98                    | 0.74, 1.29 | 0.8584  |
| [50-60[                                                        | Reference               |            |         |
| [60-70[                                                        | 0.90                    | 0.68, 1.19 | 0.4578  |
| >=70                                                           | 0.65                    | 0.47, 0.91 | 0.0106  |
| <b>Gender</b>                                                  |                         |            |         |
| Male                                                           | Reference               |            |         |
| Female                                                         | 0.93                    | 0.76, 1.13 | 0.4457  |
| <b>Household size and composition- Nb children (&lt;18yrs)</b> |                         |            |         |
| 0                                                              | Reference               |            |         |
| 1+                                                             | 1.14                    | 0.90, 1.44 | 0.2800  |
| <b>Smoking status before lockdown</b>                          |                         |            |         |
| Active smoker                                                  | 0.81                    | 0.60, 1.11 | 0.1903  |
| Ex-smoker                                                      | 1.01                    | 0.83, 1.23 | 0.9185  |
| Non smoker                                                     | Reference               |            |         |

<sup>a</sup>with stratification on the source cohort. 235 participants were excluded from the multivariable model due to missing smoking status

**Supplementary table S3. multivariable analysis of factors associated with a positive SN.**

|                                                      | Odds-Ratio <sup>a</sup> | 95%CI      | P-value |
|------------------------------------------------------|-------------------------|------------|---------|
| Regions                                              |                         |            |         |
| Ile-de-France                                        | 3.48                    | 2.54, 4.76 | <0.0001 |
| Grand Est                                            | 3.16                    | 2.25, 4.23 | <0.0001 |
| Nouvelle-Aquitaine                                   | Reference               |            |         |
| Age group (years)                                    |                         |            |         |
| <40                                                  | 1.10                    | 0.81, 1.51 | 0.5391  |
| [40-50[                                              | 1.14                    | 0.84, 1.54 | 0.4005  |
| [50-60[                                              | Reference               |            |         |
| [60-70[                                              | 0.74                    | 0.54, 1.03 | 0.0753  |
| >=70                                                 | 0.65                    | 0.45, 0.93 | 0.0176  |
| Gender                                               |                         |            |         |
| Male                                                 | Reference               |            |         |
| Female                                               | 1.11                    | 0.89, 1.40 | 0.3406  |
| Household size and composition- Nb children (<18yrs) |                         |            |         |
| 0                                                    | Reference               |            |         |
| 1+                                                   | 1.21                    | 0.94, 1.56 | 0.1393  |
| Smoking status before lockdown                       |                         |            |         |
| Active smoker                                        | 0.69                    | 0.48, 1.00 | 0.0491  |
| Ex-smoker                                            | 1.08                    | 0.88, 1.34 | 0.4607  |
| Non smoker                                           | Reference               |            |         |

<sup>a</sup>with stratification on the source cohort. 235 participants were excluded from the multivariable model due to missing smoking status

**Supplementary Table S4. multivariable analysis of factors associated with a positive MI.**

|                                                      | Odds-Ratio <sup>a</sup> | 95%CI      | P-value |
|------------------------------------------------------|-------------------------|------------|---------|
| Regions                                              |                         |            |         |
| Ile-de-France                                        | 2.88                    | 2.34, 3.55 | <0.0001 |
| Grand Est                                            | 2.56                    | 2.04, 3.21 | <0.0001 |
| Nouvelle-Aquitaine                                   | Reference               |            |         |
| Age group (years)                                    |                         |            |         |
| <40                                                  | 1.70                    | 1.36, 2.11 | <0.0001 |
| [40-50[                                              | 1.78                    | 1.45, 2.20 | <0.0001 |
| [50-60[                                              | Reference               |            |         |
| [60-70[                                              | 0.75                    | 0.58, 0.95 | 0.0188  |
| >=70                                                 | 0.54                    | 0.40, 0.72 | <0.0001 |
| Gender                                               |                         |            |         |
| Male                                                 | Reference               |            |         |
| Female                                               | 1.14                    | 0.98, 1.33 | 0.1014  |
| Household size and composition- Nb children (<18yrs) |                         |            |         |
| 0                                                    | Reference               |            |         |
| 1+                                                   | 1.25                    | 1.06, 1.48 | 0.0086  |
| Smoking status before lockdown                       |                         |            |         |
| Active smoker                                        | 0.72                    | 0.57, 0.91 | 0.0062  |
| Ex-smoker                                            | 0.96                    | 0.82, 1.11 | 0.5567  |
| Non smoker                                           | Reference               |            |         |

<sup>a</sup>with stratification on the source cohort. 235 participants were excluded from the multivariable model due to missing smoking status
